# Supplementary material
Source: HighWire-hosted journal article supplement (https://jnm.snmjournals.org/highwire/filestream/93950/field_highwire_adjunct_files/0/51847_Supplemental_Figure_1.pdf)
Supplement: 51847_Supplemental_Figure_1.pdf [file 51847_Supplemental_Figure_1.pdf]

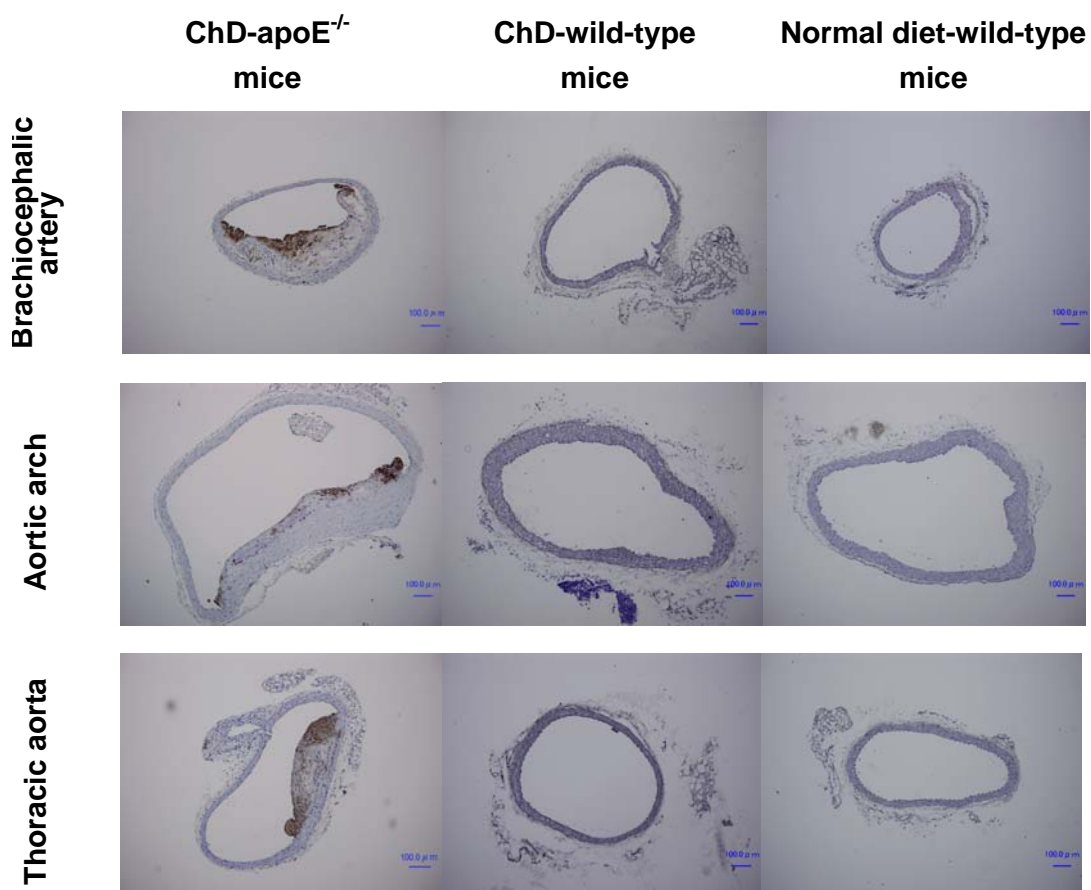

**Supplemental Figure 1.** Photomicrographs of Mac-2 immunohistochemical staining. Aortic tissues of 25 week old mice in each group were examined with Mac-2 staining using cryostat sections. Macrophage infiltration in atherosclerotic plaques was confirmed histologically in the ChD-apoE<sup>-/-</sup> mice but not in the ChD-wild-type or normal diet-wild-type mice. Bar = 100  $\mu$ m.
